# Supplementary material for: Exploring Sequence Characteristics Related to High-Level Production of Secreted Proteins in Aspergillus niger
Source: PLOS journal article supplement (doi:10.1371/journal.pone.0045869), 2012-10-01

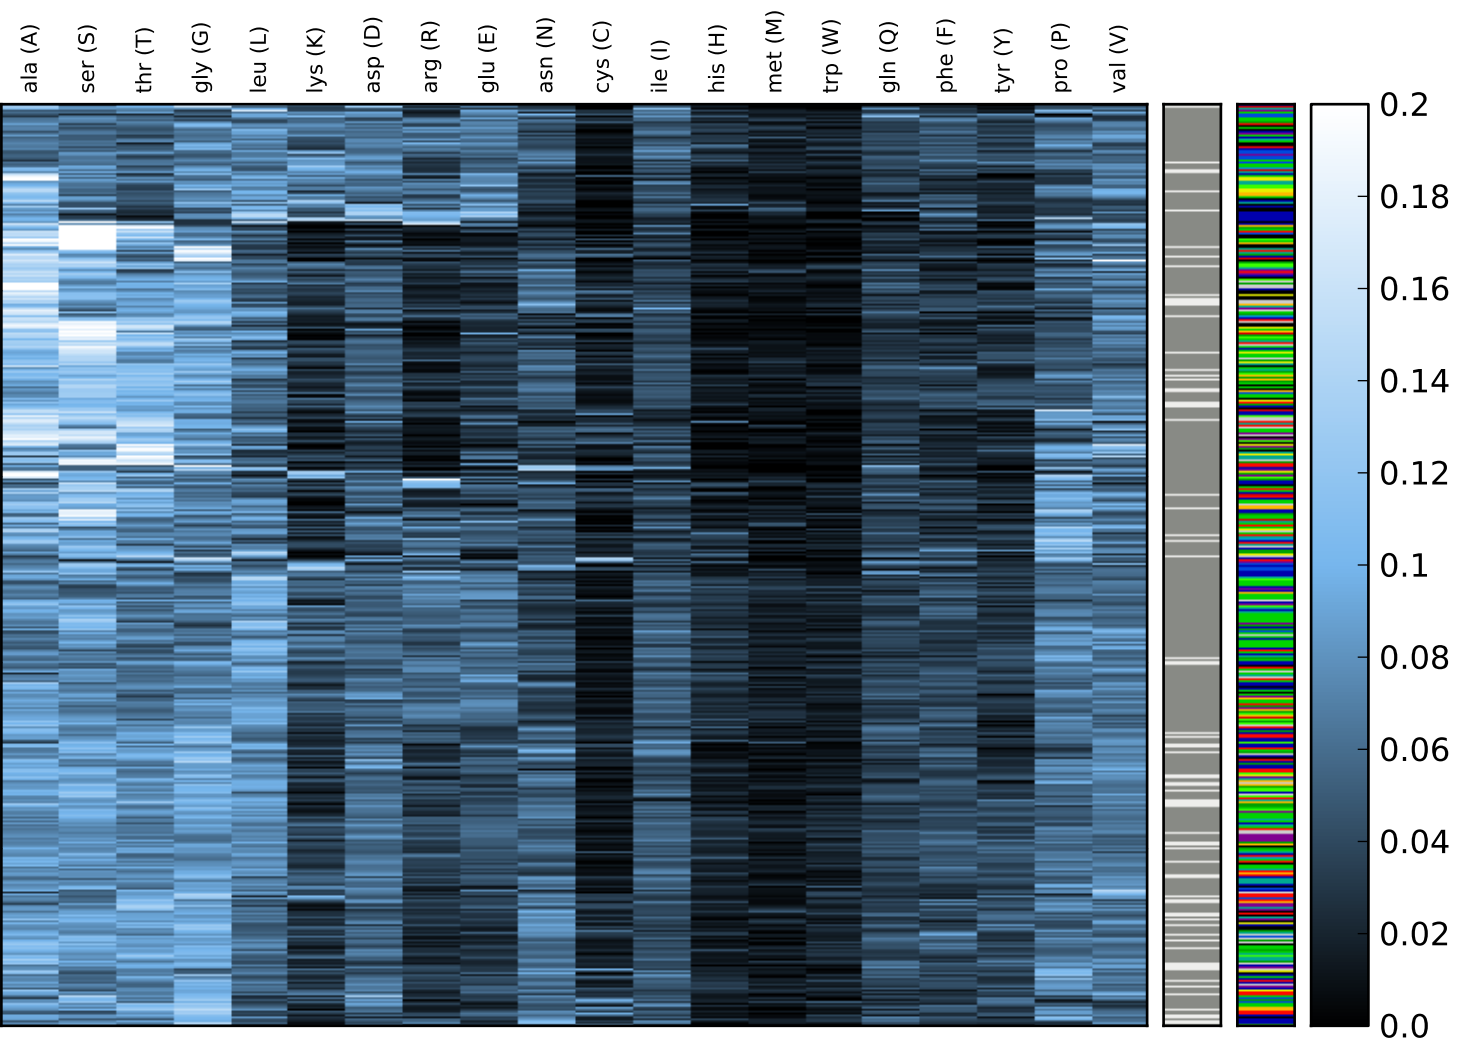

Supplement: S2 (10.1371/journal.pone.0045869.s002) [file journal.pone.0045869.s002]
