# Supplementary material for: Exploring Sequence Characteristics Related to High-Level Production of Secreted Proteins in Aspergillus niger
Source: PLoS One. 2012 Oct 1;7(10):e45869. doi: 10.1371/journal.pone.0045869 (PMC3462195; doi:10.1371/journal.pone.0045869)
Supplement: Table S4 — Contains the -values and corresponding -values as obtained from a two-sample -test on the 124 features that were used for feature selection. For both and , the features are ordered by the absolute -value. (XLS) [file pone.0045869.s015.xls]

## Sheet: Sheet1
hom					het
feature name	t	abs(t)	p		feature name	t	abs(t)	p
basic	8.52138	8.52138	5.06574e-16		codon_TAC_Y	-8.93254	8.93254	1.99366e-18
isoelectric_point	8.00812	8.00812	1.83034e-14		cai_index	-7.1957	7.1957	1.22687e-12
protein_AA_N	-7.63898	7.63898	2.20566e-13		codon_AAC_N	-6.95341	6.95341	6.47082e-12
codon_TAC_Y	-7.52567	7.52567	4.66097e-13		codon_GGC_G	-6.94708	6.94708	6.75384e-12
protein_AA_Y	-7.19522	7.19522	3.95196e-12		sigpep_AA_A	-6.18073	6.18073	9.31527e-10
codon_AAC_N	-7.09018	7.09018	7.6876e-12		codon_GAA_E	6.08447	6.08447	1.66889e-09
protein_AA_R	6.88198	6.88198	2.81605e-11		protein_AA_Y	-6.06345	6.06345	1.89342e-09
polar_uncharged	-6.82086	6.82086	4.10079e-11		codon_ATA_I	5.69237	5.69237	1.6506e-08
protein_AA_K	6.48609	6.48609	3.07646e-10		strand	-5.60617	5.60617	2.68267e-08
charged	6.14753	6.14753	2.18682e-09		codon_GAC_D	-5.49381	5.49381	5.00324e-08
codon_CGA_R	5.80551	5.80551	1.46243e-08		buried	-5.34429	5.34429	1.12697e-07
sigpep_AA_A	-5.49731	5.49731	7.54058e-08		exposed	5.34429	5.34429	1.12697e-07
codon_AAA_K	5.41576	5.41576	1.15035e-07		codon_TTC_F	-5.31066	5.31066	1.34915e-07
buried	-5.3277	5.3277	1.80496e-07		codon_CAT_H	5.21722	5.21722	2.21245e-07
exposed	5.3277	5.3277	1.80496e-07		codon_TCA_S	5.21635	5.21635	2.22259e-07
codon_GGC_G	-5.19407	5.19407	3.53594e-07		codon_AAA_K	5.00317	5.00317	6.67177e-07
codon_ATG_M	4.87002	4.87002	1.70669e-06		codon_ATG_M	4.84296	4.84296	1.48389e-06
cai_index	-4.80051	4.80051	2.36705e-06		protein_AA_N	-4.7208	4.7208	2.68775e-06
codon_TTA_L	4.65925	4.65925	4.54799e-06		protein_AA_G	-4.67666	4.67666	3.32034e-06
codon_AGG_R	4.5857	4.5857	6.35024e-06		basic	4.64769	4.64769	3.81087e-06
helix	4.57646	4.57646	6.62021e-06		codon_AGA_R	4.61051	4.61051	4.54279e-06
protein_AA_G	-4.56673	4.56673	6.91621e-06		codon_CAG_Q	-4.60888	4.60888	4.57772e-06
codon_ACC_T	-4.55051	4.55051	7.43848e-06		codon_GTA_V	4.55534	4.55534	5.88258e-06
codon_AGA_R	4.54977	4.54977	7.46316e-06		isoelectric_point	4.22939	4.22939	2.56059e-05
sigpep_AA_I	4.54752	4.54752	7.53887e-06		sigpep_length	4.1953	4.1953	2.96992e-05
codon_CTT_L	4.54729	4.54729	7.54662e-06		protein_AA_M	4.17783	4.17783	3.20311e-05
aromatic	-4.49777	4.49777	9.41136e-06		protein_AA_R	4.162	4.162	3.42943e-05
protein_AA_L	4.42745	4.42745	1.28341e-05		codon_GTC_V	-4.14901	4.14901	3.62638e-05
strand	-4.30852	4.30852	2.14932e-05		codon_CTA_L	4.02367	4.02367	6.16692e-05
codon_CCA_P	4.28159	4.28159	2.41163e-05		codon_CGA_R	4.01534	4.01534	6.38516e-05
codon_GAC_D	-4.16499	4.16499	3.94387e-05		codon_TTA_L	4.01122	4.01122	6.49566e-05
protein_AA_M	4.15273	4.15273	4.1507e-05		codon_CGT_R	3.99664	3.99664	6.90204e-05
sigpep_length	4.04728	4.04728	6.40775e-05		protein_AA_E	3.96768	3.96768	7.78158e-05
small	-4.04297	4.04297	6.52137e-05		codon_GTT_V	3.87414	3.87414	0.000114044
codon_AAG_K	4.03114	4.03114	6.84269e-05		aromatic	-3.82532	3.82532	0.000138784
codon_CGT_R	3.96667	3.96667	8.87577e-05		codon_ATC_I	-3.81456	3.81456	0.000144883
codon_CGG_R	3.91156	3.91156	0.000110566		codon_GCA_A	3.79876	3.79876	0.000154293
codon_ATA_I	3.77292	3.77292	0.000190029		codon_AGT_S	3.68403	3.68403	0.000242022
protein_AA_H	3.71178	3.71178	0.000240068		helix	3.63452	3.63452	0.000292831
codon_GAA_E	3.6783	3.6783	0.000272493		codon_ACA_T	3.60438	3.60438	0.000328497
codon_TCA_S	3.52813	3.52813	0.000475487		charged	3.60029	3.60029	0.000333644
protein_AA_T	-3.48901	3.48901	0.000548018		codon_CCA_P	3.36364	3.36364	0.000798729
protein_AA_W	-3.45168	3.45168	0.000626743		sigpep_AA_I	3.25378	3.25378	0.00117739
codon_CTA_L	3.43896	3.43896	0.000655898		codon_TCT_S	3.2075	3.2075	0.00138194
codon_TGG_W	-3.37791	3.37791	0.000814326		codon_CTT_L	3.10315	3.10315	0.00196912
codon_CAT_H	3.32843	3.32843	0.000968179		protein_AA_F	-3.09649	3.09649	0.0020134
protein_length	-3.08893	3.08893	0.00217282		codon_CAA_Q	3.08607	3.08607	0.00208466
protein_AA_P	3.00295	3.00295	0.00287009		codon_TTT_F	2.99002	2.99002	0.00285862
protein_AA_E	2.9436	2.9436	0.00346523		codon_ATT_I	2.80772	2.80772	0.00508748
sigpep_AA_K	-2.93811	2.93811	0.00352572		codon_CTG_L	-2.77116	2.77116	0.00569045
sigpep_AA_R	2.85564	2.85564	0.0045565		polar_uncharged	-2.75985	2.75985	0.00588967
codon_CGC_R	2.76229	2.76229	0.00604899		protein_AA_K	2.74147	2.74147	0.0062268
protein_AA_D	-2.75152	2.75152	0.00624708		codon_AGC_S	-2.74022	2.74022	0.00625037
codon_GTC_V	-2.62386	2.62386	0.00908239		codon_GCT_A	2.73112	2.73112	0.00642418
codon_CAG_Q	-2.5918	2.5918	0.00995552		codon_GCG_A	-2.72298	2.72298	0.00658352
codon_ATC_I	-2.55979	2.55979	0.0109017		codon_ACC_T	-2.71135	2.71135	0.00681703
aliphatic	2.54331	2.54331	0.0114193		codon_TTG_L	2.70506	2.70506	0.00694657
codon_TCG_S	-2.53326	2.53326	0.0117456		protein_AA_D	-2.54223	2.54223	0.0111662
codon_ACA_T	2.48812	2.48812	0.0133163		protein_length	-2.50074	2.50074	0.0125542
codon_GTT_V	2.33808	2.33808	0.0199575		codon_CCT_P	2.49809	2.49809	0.0126479
codon_AAT_N	-2.26156	2.26156	0.02435		protein_AA_H	2.45957	2.45957	0.0140805
codon_GCA_A	2.25256	2.25256	0.0249184		sigpep_AA_H	2.42586	2.42586	0.0154503
codon_ACG_T	-2.18165	2.18165	0.0298139		codon_TGT_C	2.31967	2.31967	0.0205615
codon_CTC_L	1.99911	1.99911	0.0463847		codon_TGC_C	-2.30394	2.30394	0.0214326
codon_CAC_H	1.99624	1.99624	0.0466978		small	-2.2945	2.2945	0.0219705
codon_CCT_P	1.93626	1.93626	0.0536574		codon_CGG_R	2.19169	2.19169	0.0286343
codon_TAT_Y	-1.87181	1.87181	0.0620841		codon_GCC_A	-2.19124	2.19124	0.0286673
codon_TCC_S	-1.86438	1.86438	0.0631225		codon_ACG_T	-2.18933	2.18933	0.028806
codon_TTG_L	1.85395	1.85395	0.0646046		protein_AA_W	-2.16499	2.16499	0.0306267
protein_AA_F	-1.79573	1.79573	0.0734182		codon_GAT_D	2.15564	2.15564	0.0313522
codon_GTA_V	1.78364	1.78364	0.0753665		sigpep_AA_C	2.1513	2.1513	0.0316944
codon_GCG_A	-1.76426	1.76426	0.078578		protein_AA_S	2.1468	2.1468	0.0320516
codon_TCT_S	1.75077	1.75077	0.0808791		codon_AAT_N	2.12558	2.12558	0.0337858
polar	-1.70743	1.70743	0.0886468		codon_AGG_R	2.09577	2.09577	0.0363566
sigpep_AA_N	1.67717	1.67717	0.0944206		codon_TGG_W	-2.03185	2.03185	0.0424356
codon_GGT_G	-1.67131	1.67131	0.0955721		codon_TAT_Y	1.98694	1.98694	0.0472044
codon_ATT_I	1.64939	1.64939	0.0999826		codon_CCC_P	-1.78918	1.78918	0.0738915
sigpep_AA_T	1.62375	1.62375	0.105348		codon_CTC_L	-1.72065	1.72065	0.0856264
nonpolar	1.58921	1.58921	0.112934		sigpep_AA_V	1.70433	1.70433	0.0886334
codon_GCC_A	-1.53197	1.53197	0.126453		codon_ACT_T	1.60173	1.60173	0.109535
codon_GCT_A	1.51014	1.51014	0.13193		codon_GGA_G	1.59664	1.59664	0.110665
sigpep_AA_C	1.50893	1.50893	0.132238		protein_AA_L	1.56578	1.56578	0.117721
codon_TTC_F	-1.4744	1.4744	0.14129		polar	1.44712	1.44712	0.14818
codon_CAA_Q	1.45788	1.45788	0.145789		protein_AA_Q	-1.41774	1.41774	0.156582
random_coil	-1.34318	1.34318	0.180103		sigpep_AA_Q	1.39175	1.39175	0.164311
sigpep_AA_M	-1.28494	1.28494	0.19968		codon_CCG_P	-1.33103	1.33103	0.183485
sigpep_AA_Y	1.28219	1.28219	0.20064		protein_AA_C	-1.19963	1.19963	0.230569
tiny	-1.27725	1.27725	0.202379		sigpep_AA_R	1.13365	1.13365	0.257217
sigpep_AA_S	-1.24714	1.24714	0.213197		protein_AA_P	1.121	1.121	0.262559
sigpep_AA_Q	1.12315	1.12315	0.26216		acidic	1.11141	1.11141	0.266663
codon_TGT_C	1.09844	1.09844	0.272781		sigpep_AA_W	1.09221	1.09221	0.275008
protein_AA_Q	-1.02458	1.02458	0.306282		sigpep_AA_N	1.06926	1.06926	0.285214
sigpep_AA_P	1.01017	1.01017	0.313125		nonpolar	-1.01649	1.01649	0.309642
codon_TAA_Z	1	1	0.318015		sigpep_AA_E	1.0143	1.0143	0.310688
codon_TAG_Z	1	1	0.318015		codon_TAA_Z	1	1	0.317555
codon_TGA_Z	1	1	0.318015		codon_TAG_Z	1	1	0.317555
codon_TTT_F	-0.906788	0.906788	0.365156		codon_TGA_Z	1	1	0.317555
protein_AA_I	-0.865839	0.865839	0.387184		sigpep_AA_T	0.971287	0.971287	0.331643
sigpep_AA_D	0.821633	0.821633	0.411857		protein_AA_V	-0.955271	0.955271	0.339674
sigpep_AA_G	0.802195	0.802195	0.422996		protein_AA_T	-0.946179	0.946179	0.344288
codon_GAG_E	0.592754	0.592754	0.553737		random_coil	0.9399	0.9399	0.347498
hydrophobic	0.568079	0.568079	0.570353		sigpep_AA_P	0.919005	0.919005	0.358317
codon_AGT_S	0.511332	0.511332	0.609447		codon_CAC_H	-0.915145	0.915145	0.360339
codon_CCG_P	0.504315	0.504315	0.614364		aliphatic	0.821737	0.821737	0.411425
sigpep_AA_E	0.467366	0.467366	0.640535		protein_AA_A	0.770096	0.770096	0.441427
protein_AA_V	-0.455707	0.455707	0.648889		codon_TCG_S	-0.726534	0.726534	0.467683
sigpep_AA_V	0.445969	0.445969	0.655901		sigpep_AA_K	0.704751	0.704751	0.481131
protein_AA_A	0.399222	0.399222	0.689978		protein_AA_I	0.669888	0.669888	0.503086
codon_AGC_S	0.346673	0.346673	0.729049		codon_CGC_R	-0.634903	0.634903	0.525639
sigpep_AA_W	0.323883	0.323883	0.746224		sigpep_AA_Y	0.6174	0.6174	0.537113
codon_GAT_D	-0.322423	0.322423	0.747328		codon_GTG_V	-0.59951	0.59951	0.54897
codon_GTG_V	-0.319216	0.319216	0.749757		sigpep_AA_S	-0.575043	0.575043	0.565393
protein_AA_S	0.312067	0.312067	0.755179		sigpep_AA_D	0.43992	0.43992	0.660091
codon_GGA_G	-0.233105	0.233105	0.815819		codon_GGG_G	-0.400775	0.400775	0.688673
protein_AA_C	0.222852	0.222852	0.823783		sigpep_AA_F	0.311582	0.311582	0.755424
sigpep_AA_H	-0.222848	0.222848	0.823787		sigpep_AA_M	-0.2826	0.2826	0.777543
codon_CTG_L	0.204427	0.204427	0.838141		hydrophobic	-0.267675	0.267675	0.789006
codon_CCC_P	-0.18573	0.18573	0.852767		sigpep_AA_G	0.222963	0.222963	0.823611
codon_TGC_C	-0.161839	0.161839	0.871528		codon_GAG_E	-0.184537	0.184537	0.85363
acidic	0.160934	0.160934	0.87224		tiny	-0.149961	0.149961	0.880826
sigpep_AA_F	0.13376	0.13376	0.893671		codon_GGT_G	0.129253	0.129253	0.897184
sigpep_AA_L	0.126552	0.126552	0.899369		codon_AAG_K	-0.096829	0.096829	0.922881
codon_GGG_G	-0.106464	0.106464	0.915276		sigpep_AA_L	0.088484	0.088484	0.92951
codon_ACT_T	-0.077718	0.077718	0.938097		codon_TCC_S	-0.041794	0.041794	0.966672
